# Supplementary material for: Early-Life Development of the Bifidobacterial Community in the Infant Gut
Source: PubMed Central journal article supplement (PMC8036440; doi:10.3390/ijms22073382), 2021-03-25
Supplement: ijms-22-03382-s001.pdf [file ijms-22-03382-s001.pdf]

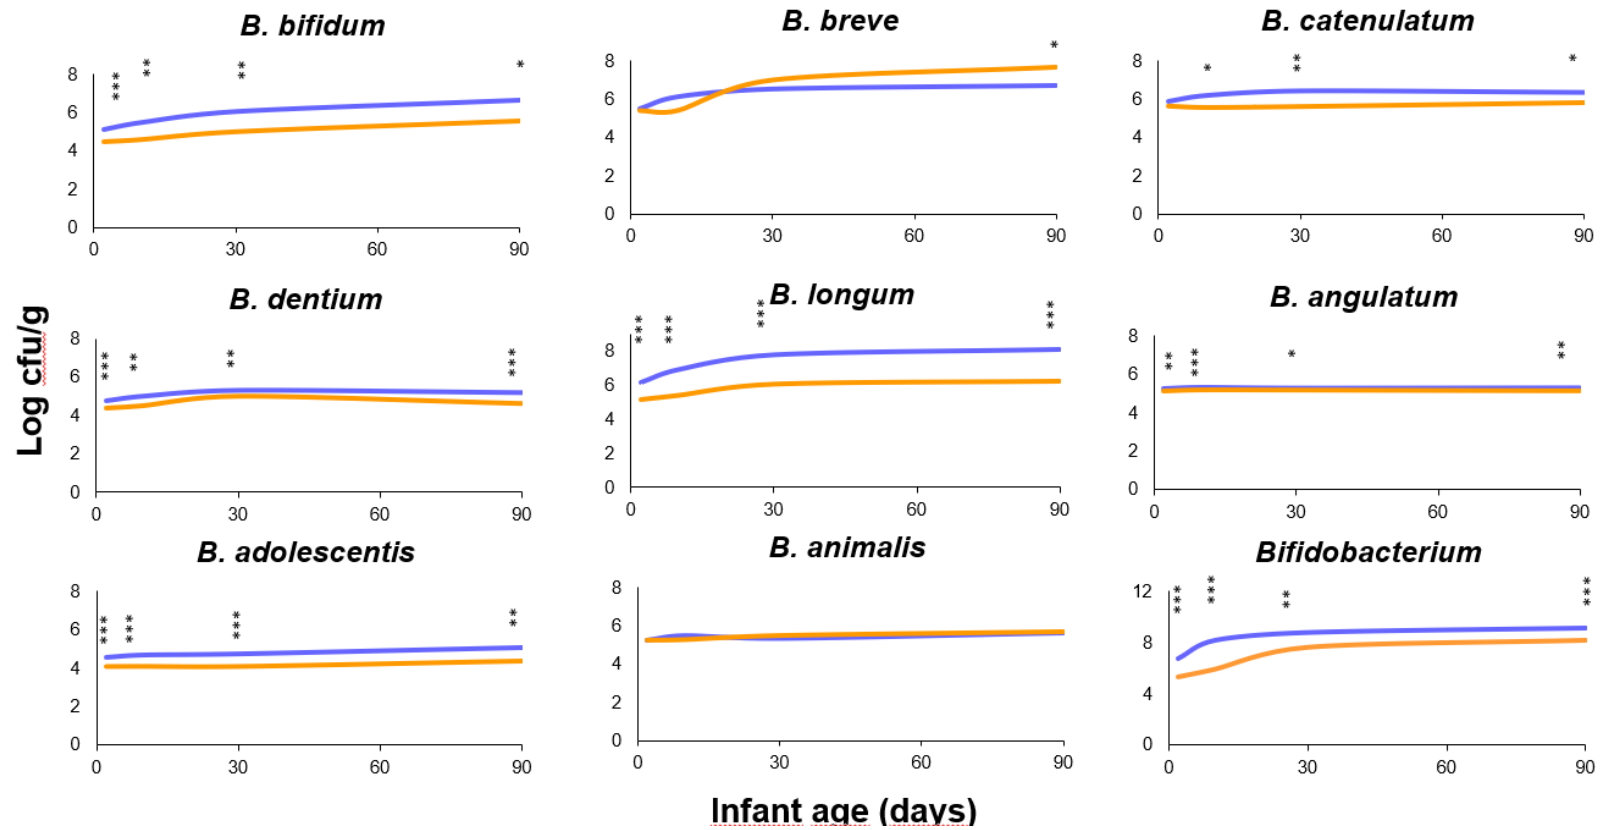

**Figure S1.** qPCR fecal levels (Log N° cells/gr) of the dominant Bifidobacterium species (*B. longum*, *B. bifidum*, *B. breve*, *B. catenulatum*, *B. dentium*, *B. adolescentis*, *B. animalis* subsp. *lactis*, *B. angulatum* and total *Bifidobacterium*) in full-term (blue line) and preterm babies (orange line) during the first three months of life. \* p<0.05, \*\* p<0.01, \*\*\*p<0.001.

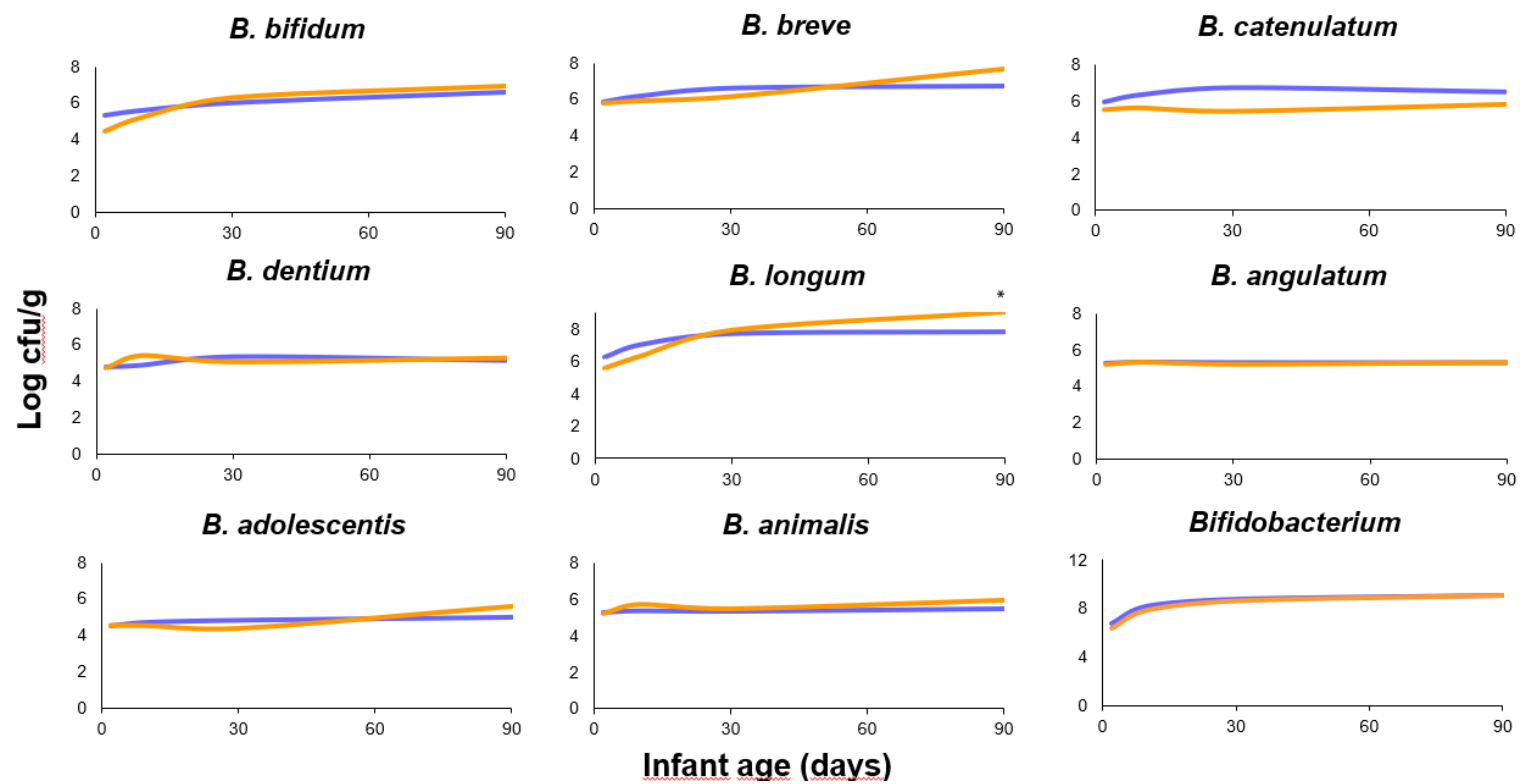

**Figure S2.** Fecal levels (Log N<sup>o</sup> cells/gr) of *B. longum*, *B. bifidum*, *B. breve*, *B. catenulatum*, *B. dentium*, *B. adolescentis*, *B. animalis* subsp. *lactis*, *B. angulatum* and total *Bifidobacterium* in vaginally delivered (blue line) and CS-delivered full-term babies (orange line) during the first three months of live. \* p<0.05.

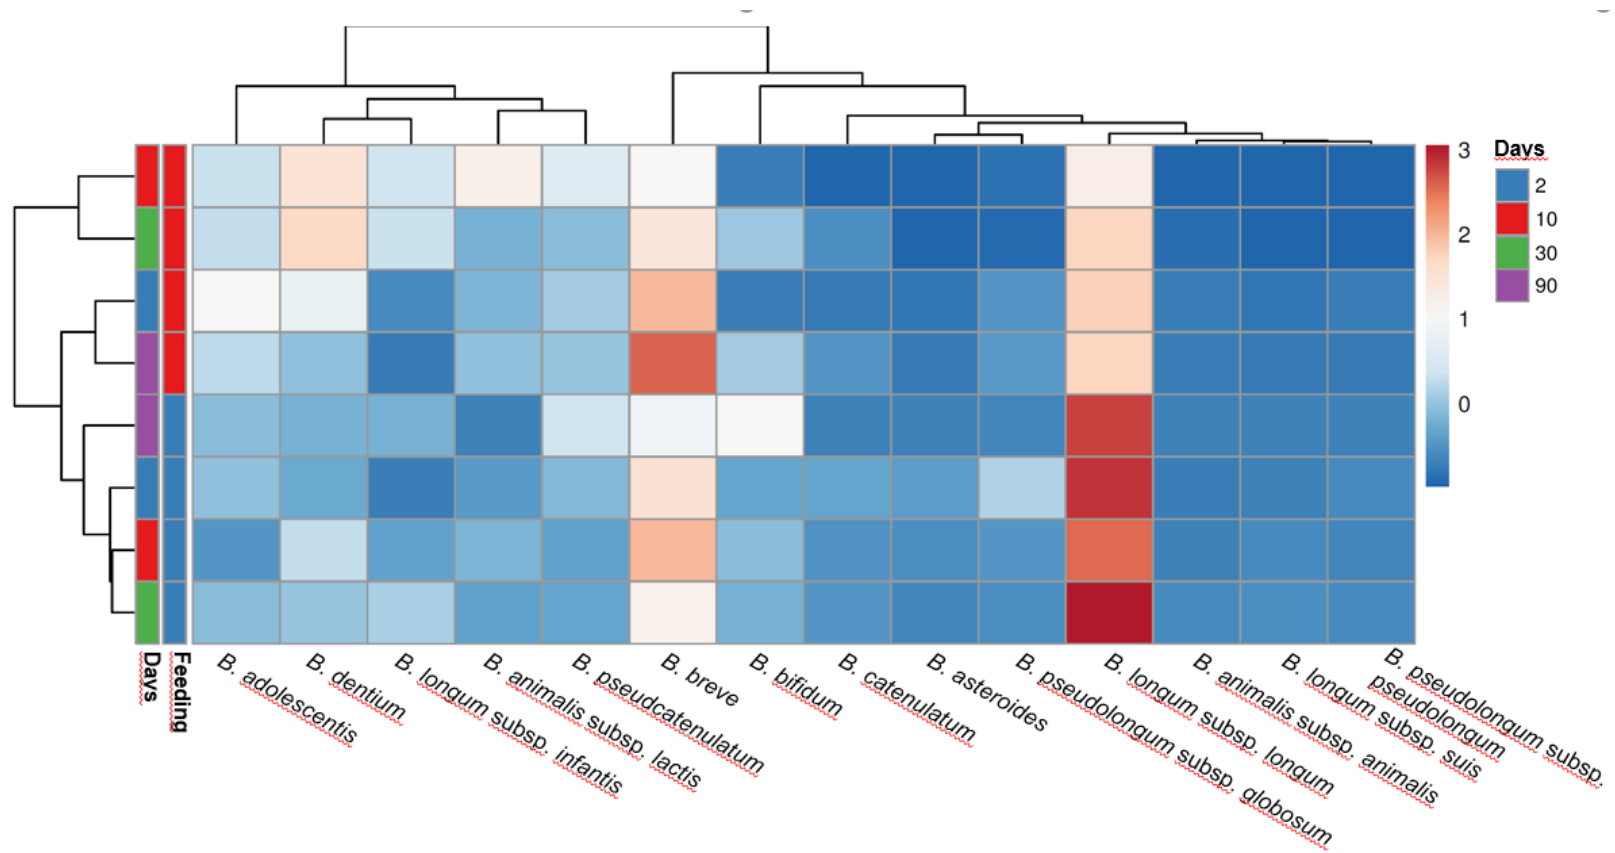

**Figure S3.** Heat map showing the relative proportions of the different *Bifidobacterium* species/subspecies at 2, 10, 30 and 90 days of age in vaginally delivered full-term babies exclusively breast-fed (Feeding: blue) or received formula/mixed feeding (Feeding: red).

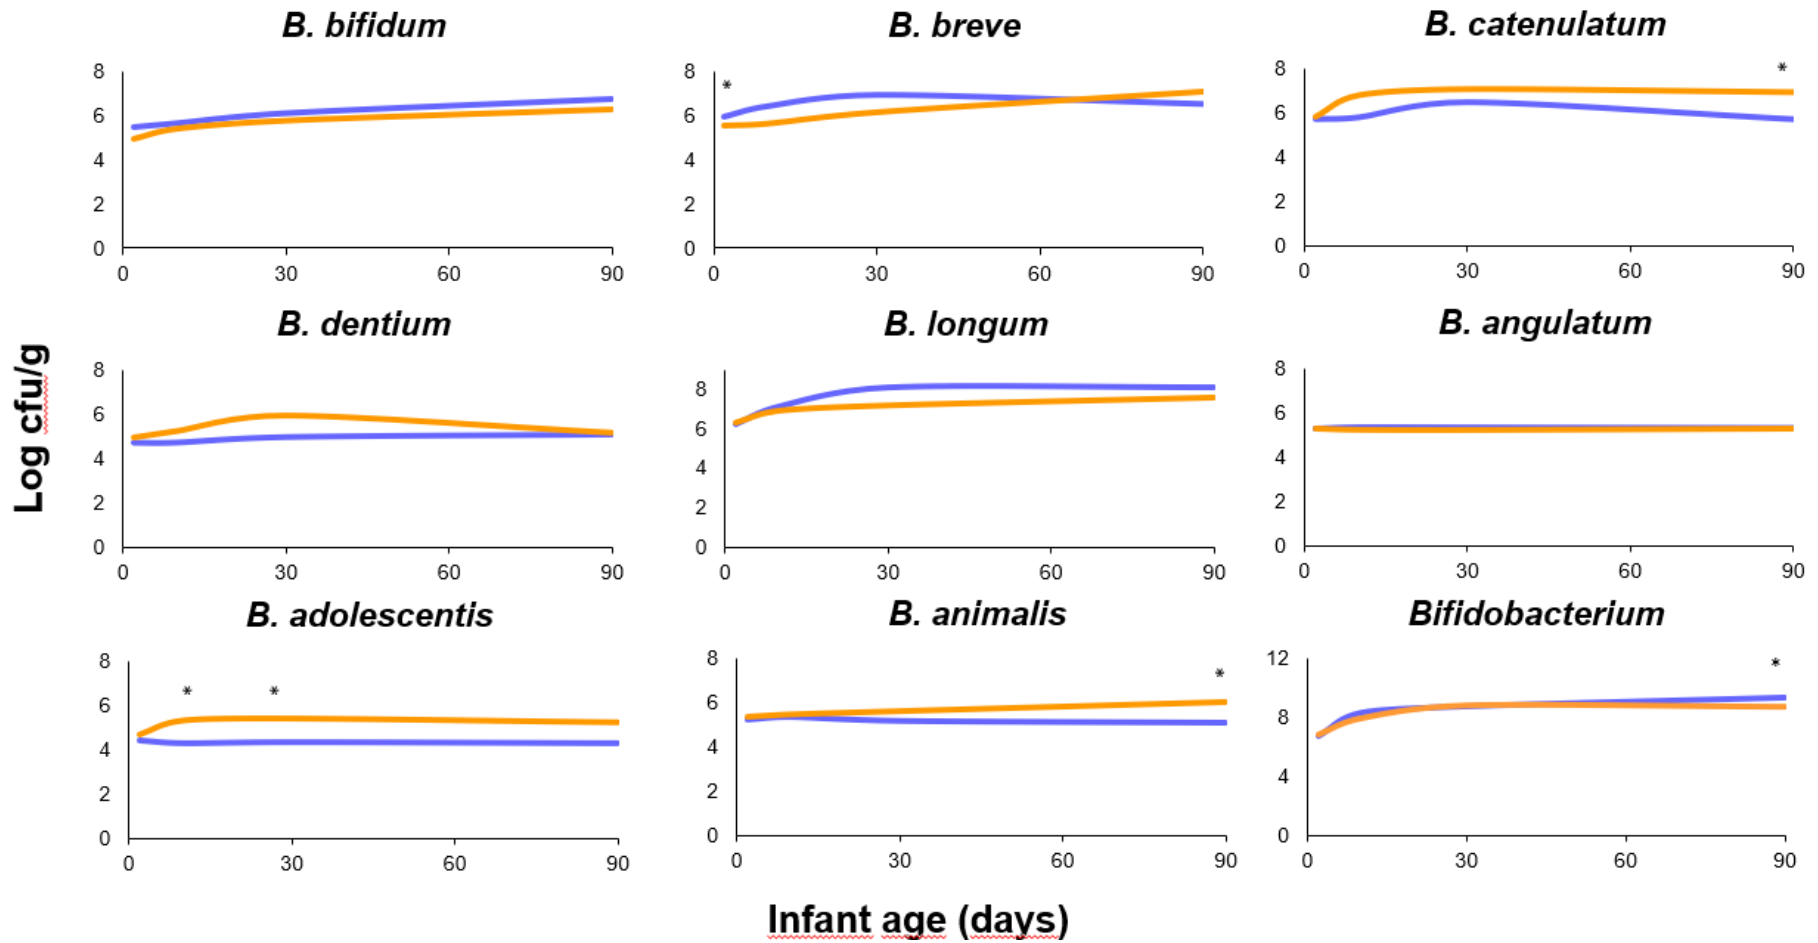

**Figure S4.** Fecal levels (Log N<sup>o</sup> cells/gr) of *B. longum*, *B. bifidum*, *B. breve*, *B. catenulatum*, *B. dentium*, *B. adolescentis*, *B. animalis* subsp. lactis, *B. angulatum* and total *Bifidobacterium* in vaginally delivered full-term babies being exclusively breastfed (blue line) or under formula/mix-feeding (orange line), during the first three months of life. \* p<0.05

**Table S1.** Occurrence of the different *Bifidobacterium* species/subspecies according to the ITS sequencing results (% of infants in which sequences from the specie/sub-specie were detected) at the different time points analyses (2, 10, 30 and 90 days of age) in the infant cohort included in this study.

|                                                   | 2 days | 10 days | 30 days | 90 days |
|---------------------------------------------------|--------|---------|---------|---------|
| <i>B. adolescentis</i>                            | 84.3   | 85.5    | 84.6    | 85.2    |
| <i>B. animalis</i> subsp. <i>animalis</i>         | 38.6   | 48.2    | 35.9    | 39.3    |
| <i>B. animalis</i> subsp. <i>lactis</i>           | 79.5   | 74.7    | 83.3    | 88.5    |
| <i>B. anseris</i>                                 | 30.1   | 31.1    | 26.9    | 23.0    |
| <i>B. asteroides</i>                              | 42.2   | 41.0    | 44.9    | 44.3    |
| <i>B. biavatii</i>                                | 15.7   | 18.1    | 12.8    | 14.8    |
| <i>B. bifidum</i>                                 | 78.3   | 79.5    | 82.1    | 83.6    |
| <i>B. breve</i>                                   | 96.4   | 97.6    | 96.6    | 98.4    |
| <i>B. catenulatum</i>                             | 63.9   | 61.4    | 50      | 52.5    |
| <i>B. choerinum</i>                               | 25.3   | 25.3    | 21.5    | 19.7    |
| <i>B. crudilactis</i>                             | 31.3   | 34.9    | 33.3    | 31.1    |
| <i>B. dentium</i>                                 | 73.5   | 73.5    | 71.8    | 78.7    |
| <i>B. eulemuris</i>                               | 20.5   | 14.5    | 7.7     | 6.6     |
| <i>B. italicum</i>                                | 22.9   | 30.1    | 21.8    | 23.0    |
| <i>B. kashiwanohense</i>                          | 42.2   | 39.8    | 37.2    | 41.0    |
| <i>B. longum</i> subsp. <i>infantis</i>           | 65.1   | 63.9    | 62.8    | 55.7    |
| <i>B. longum</i> subsp. <i>longum</i>             | 97.6   | 98.8    | 98.7    | 98.4    |
| <i>B. longum</i> subsp. <i>suis</i>               | 62.7   | 61.4    | 62.8    | 70.5    |
| <i>B. longum</i> subspp                           | 80.7   | 68.7    | 62.8    | 70.5    |
| <i>B. magnum</i>                                  | 41.0   | 41.0    | 37.2    | 44.3    |
| <i>B. mongoliense</i>                             | 36.1   | 37.3    | 35.9    | 36.1    |
| <i>B. parmae</i>                                  | 36.1   | 33.7    | 29.5    | 21.3    |
| <i>B. pseudocatenulatum</i>                       | 73.5   | 69.9    | 67.9    | 70.5    |
| <i>B. pseudolongum</i> subsp. <i>globosum</i>     | 66.3   | 71.1    | 73.1    | 72.1    |
| <i>B. pseudolongum</i> subsp. <i>pseudolongum</i> | 57.8   | 50.6    | 60.3    | 55.7    |
| <i>B. pseudolongum</i> subsp                      | 54.2   | 48.2    | 42.3    | 41.0    |
| <i>B. reuteri</i>                                 | 28.9   | 24.1    | 29.5    | 37.7    |
| <i>B. scardovii</i>                               | 22.9   | 20.5    | 26.9    | 29.5    |
| <i>B. stellenboschense</i>                        | 22.0   | 14.5    | 15.4    | 11.5    |
| <i>B. thermacidophilum</i> subsp. <i>porcinum</i> | 24.1   | 31.3    | 20.5    | 19.7    |

|                                                           |      |      |      |      |
|-----------------------------------------------------------|------|------|------|------|
| <i>B. thermacidophilum</i> subsp. <i>thermacidophilum</i> | 25.3 | 24.1 | 23.1 | 23.0 |
| <i>B. thermophilum</i>                                    | 36.1 | 38.6 | 33.3 | 36.1 |
| <i>B. tissieri</i>                                        | 8.4  | 13.3 | 15.4 | 8.2  |
| <i>B. tsurumiense</i>                                     | 19.3 | 11.8 | 15.4 | 14.8 |
| <i>B. vansinderenii</i>                                   | 22.9 | 22.9 | 20.5 | 23.0 |
| Others                                                    | 63.9 | 59   | 61.5 | 59.0 |
| Putative new bifidobacterial species                      | 89.2 | 90.9 | 87.2 | 93.4 |

**Table S2.** Relative proportion (%) of the minority *Bifidobacterium* species in the faeces of full-term and preterm neonates at 2, 10, 30 and 90 days of age. ns: non statistically significant differences ( $p>0.05$ ).

|                                           |         | 2 d               |                 | 10 d              |                 | 30 d              |                 | 90 d              |                 |
|-------------------------------------------|---------|-------------------|-----------------|-------------------|-----------------|-------------------|-----------------|-------------------|-----------------|
|                                           |         | Mean $\pm$ SD     | <i>p</i> -value | Mean $\pm$ SD     | <i>p</i> -value | Mean $\pm$ SD     | <i>p</i> -value | Mean $\pm$ SD     | <i>p</i> -value |
| <i>B. animalis</i> subsp. <i>animalis</i> | TERM    | 0.265 $\pm$ 0.701 | ns              | 0.028 $\pm$ 0.112 | 0.008           | 0.286 $\pm$ 1.569 | ns              | 0.256 $\pm$ 1.203 | ns              |
|                                           | PRETERM | 0.060 $\pm$ 0.191 |                 | 0.127 $\pm$ 0.370 |                 | 0.053 $\pm$ 0.253 |                 | 0.006 $\pm$ 0.013 |                 |
| <i>B. anseris</i>                         | TERM    | 0.010 $\pm$ 0.067 | 0.000           | 0.006 $\pm$ 0.255 | 0.000           | 0.006 $\pm$ 0.255 | 0.000           | 0.001 $\pm$ 0.006 | 0.000           |
|                                           | PRETERM | 0.350 $\pm$ 1.143 |                 | 0.367 $\pm$ 0.718 |                 | 0.015 $\pm$ 0.090 |                 | 0.029 $\pm$ 0.051 |                 |
| <i>B. biavatii</i>                        | TERM    | 0.001 $\pm$ 0.003 | ns              | 0.003 $\pm$ 0.011 | 0.006           | 0.003 $\pm$ 0.011 | ns              | 0.002 $\pm$ 0.009 | ns              |
|                                           | PRETERM | 0.025 $\pm$ 0.067 |                 | 0.053 $\pm$ 0.152 |                 | 0.082 $\pm$ 0.269 |                 | 0.003 $\pm$ 0.009 |                 |
| <i>B. choerinum</i>                       | TERM    | 0.004 $\pm$ 0.024 | 0.000           | 0.003 $\pm$ 0.020 | 0.000           | 0.001 $\pm$ 0.003 | 0.035           | 0.001 $\pm$ 0.002 | 0.007           |
|                                           | PRETERM | 0.088 $\pm$ 0.230 |                 | 0.101 $\pm$ 0.203 |                 | 0.063 $\pm$ 0.194 |                 | 0.012 $\pm$ 0.029 |                 |
| <i>B. crudilactis</i>                     | TERM    | 0.147 $\pm$ 0.914 | 0.000           | 0.021 $\pm$ 0.093 | 0.000           | 0.000 $\pm$ 0.001 | 0.000           | 0.004 $\pm$ 0.017 | 0.000           |
|                                           | PRETERM | 0.169 $\pm$ 0.230 |                 | 0.294 $\pm$ 0.685 |                 | 0.116 $\pm$ 0.177 |                 | 0.071 $\pm$ 0.148 |                 |
| <i>B. eulemuris</i>                       | TERM    | 0.056 $\pm$ 0.208 | ns              | 0.013 $\pm$ 0.078 | ns              | 0.034 $\pm$ 0.197 | ns              | 0.000 $\pm$ 0.001 | ns              |
|                                           | PRETERM | 0.264 $\pm$ 0.978 |                 | 0.219 $\pm$ 1.032 |                 | 0.731 $\pm$ 4.506 |                 | 0.001 $\pm$ 0.004 |                 |
| <i>B. italicum</i>                        | TERM    | 0.002 $\pm$ 0.012 | 0.000           | 0.002 $\pm$ 0.009 | 0.000           | 0.000 $\pm$ 0.001 | 0.000           | 0.000 $\pm$ 0.001 | 0.000           |
|                                           | PRETERM | 0.053 $\pm$ 0.094 |                 | 0.912 $\pm$ 5.528 |                 | 0.026 $\pm$ 0.052 |                 | 0.366 $\pm$ 1.765 |                 |
| <i>B. kashiwanohense</i>                  | TERM    | 0.502 $\pm$ 2.046 | ns              | 0.059 $\pm$ 0.195 | 0.025           | 0.747 $\pm$ 4.335 | ns              | 0.515 $\pm$ 2.726 | ns              |
|                                           | PRETERM | 0.048 $\pm$ 0.097 |                 | 0.036 $\pm$ 0.085 |                 | 0.018 $\pm$ 0.043 |                 | 0.038 $\pm$ 0.108 |                 |
| <i>B. longum</i> subsp. <i>suis</i>       | TERM    | 0.296 $\pm$ 1.447 | 0.000           | 0.480 $\pm$ 2.186 | 0.000           | 0.569 $\pm$ 2.944 | 0.001           | 0.105 $\pm$ 0.311 | 0.000           |
|                                           | PRETERM | 1.671 $\pm$ 1.987 |                 | 2.110 $\pm$ 3.372 |                 | 1.517 $\pm$ 5.523 |                 | 1.627 $\pm$ 5.897 |                 |
| <i>B. longum</i> subspp                   | TERM    | 0.023 $\pm$ 0.032 | 0.028           | 0.037 $\pm$ 0.150 | 0.000           | 0.047 $\pm$ 0.201 | ns              | 0.018 $\pm$ 0.034 | 0.047           |
|                                           | PRETERM | 0.044 $\pm$ 0.061 |                 | 0.037 $\pm$ 0.043 |                 | 0.072 $\pm$ 0.280 |                 | 0.109 $\pm$ 0.390 |                 |
| <i>B. magnum</i>                          | TERM    | 0.002 $\pm$ 0.006 | 0.000           | 0.045 $\pm$ 0.262 | 0.000           | 0.002 $\pm$ 0.005 | 0.000           | 0.009 $\pm$ 0.032 | 0.002           |

|                                                              |         |               |       |               |       |                |       |               |       |
|--------------------------------------------------------------|---------|---------------|-------|---------------|-------|----------------|-------|---------------|-------|
|                                                              | PRETERM | 0.400 ± 0.534 |       | 0.305 ± 0.474 |       | 0.280 ± 0.555  |       | 0.117 ± 0.308 |       |
| <i>B. mongoliense</i>                                        | TERM    | 0.015 ± 0.068 | 0.000 | 0.004 ± 0.019 | 0.000 | 0.054 ± 0.291  | 0.003 | 0.012 ± 0.063 | 0.001 |
|                                                              | PRETERM | 0.116 ± 0.208 |       | 0.118 ± 0.259 |       | 0.069 ± 0.112  |       | 0.042 ± 0.084 |       |
| <i>B. parvae</i>                                             | TERM    | 1.197 ± 4.616 | ns    | 0.058 ± 0.195 | 0.044 | 0.019 ± 0.066  | 0.032 | 0.001 ± 0.006 | 0.013 |
|                                                              | PRETERM | 0.434 ± 2.327 |       | 0.687 ± 3.847 |       | 0.489 ± 1.926  |       | 0.144 ± 0.359 |       |
| <i>B. pseudolongum</i> subsp                                 | TERM    | 0.613 ± 2.623 | 0.000 | 0.119 ± 0.653 | 0.000 | 0.002 ± 0.007  | 0.000 | 0.026 ± 0.117 | 0.001 |
|                                                              | PRETERM | 0.697 ± 1.318 |       | 1.333 ± 2.342 |       | 0.676 ± 1.490  |       | 0.463 ± 1.303 |       |
| <i>B. reuteri</i>                                            | TERM    | 0.035 ± 0.143 | 0.038 | 0.047 ± 0.181 | 0.004 | 0.016 ± 0.080  | ns    | 0.018 ± 0.071 | 0.004 |
|                                                              | PRETERM | 0.169 ± 0.332 |       | 0.070 ± 0.175 |       | 0.043 ± 0.127  |       | 0.036 ± 0.055 |       |
| <i>B. scardovii</i>                                          | TERM    | 0.041 ± 0.180 | ns    | 0.015 ± 0.061 | ns    | 0.737 ± 4.633  | ns    | 0.379 ± 2.223 | ns    |
|                                                              | PRETERM | 0.041 ± 0.157 |       | 0.023 ± 0.096 |       | 0.024 ± 0.081  |       | 0.176 ± 0.857 |       |
| <i>B. stellenboschense</i>                                   | TERM    | 0.032 ± 0.124 | ns    | 0.007 ± 0.045 | 0.048 | 0.000 ± 0.000  | ns    | 0.000 ± 0.001 | ns    |
|                                                              | PRETERM | 0.012 ± 0.041 |       | 0.581 ± 3.668 |       | 0.007 ± 0.023  |       | 0.002 ± 0.004 |       |
| <i>B. thermacidophilum</i><br>subsp. <i>porcinum</i>         | TERM    | 0.003 ± 0.020 | 0.000 | 0.001 ± 0.006 | 0.000 | 0.019 ± 0.117  | 0.000 | 0.001 ± 0.004 | 0.000 |
|                                                              | PRETERM | 0.114 ± 0.420 |       | 1.693 ± 9.863 |       | 0.120 ± 0.442  |       | 0.019 ± 0.045 |       |
| <i>B. thermacidophilum</i><br>subsp. <i>thermacidophilum</i> | TERM    | 0.001 ± 0.002 | 0.000 | 0.010 ± 0.057 | 0.000 | 0.000 ± 0.001  | 0.000 | 0.001 ± 0.005 | 0.008 |
|                                                              | PRETERM | 0.225 ± 0.548 |       | 0.114 ± 0.217 |       | 0.117 ± 0.361  |       | 0.038 ± 0.147 |       |
| <i>B. thermophilum</i>                                       | TERM    | 0.028 ± 0.126 | 0.000 | 0.012 ± 0.035 | 0.001 | 0.003 ± 0.009  | 0.005 | 0.007 ± 0.024 | ns    |
|                                                              | PRETERM | 0.084 ± 0.146 |       | 0.071 ± 0.108 |       | 0.070 ± 0.168  |       | 0.042 ± 0.129 |       |
| <i>B. tissieri</i>                                           | TERM    | 0.147 ± 0.940 | 0.045 | 0.000 ± 0.000 | 0.000 | 0.000 ± 0.000  | 0.001 | 0.000 ± 0.000 | ns    |
|                                                              | PRETERM | 0.010 ± 0.030 |       | 0.011 ± 0.026 |       | 0.013 ± 0.034  |       | 0.038 ± 0.186 |       |
| <i>B. tsurumiense</i>                                        | TERM    | 0.000 ± 0.001 | 0.002 | 0.001 ± 0.003 | ns    | 0.000 ± 0.000  | 0.001 | 0.001 ± 0.002 | ns    |
|                                                              | PRETERM | 0.013 ± 0.029 |       | 0.006 ± 0.021 |       | 0.884 ± 5.397  |       | 0.003 ± 0.006 |       |
| <i>B. vansinderenii</i>                                      | TERM    | 0.022 ± 0.123 | 0.000 | 0.020 ± 0.100 | 0.009 | 0.000 ± 0.001  | 0.000 | 0.002 ± 0.008 | 0.000 |
|                                                              | PRETERM | 0.095 ± 0.148 |       | 0.110 ± 0.179 |       | 0.081 ± 0.137  |       | 0.105 ± 0.372 |       |
| Putative new bifidobac-<br>terial species                    | TERM    | 2.058 ± 7.364 | 0.012 | 1.385 ± 4.180 | 0.001 | 4.393 ± 13.733 | ns    | 3.434 ± 9.304 | ns    |
|                                                              | PRETERM | 2.239 ± 2.177 |       | 2.875 ± 3.693 |       | 1.658 ± 2.168  |       | 1.137 ± 2.700 |       |
| Others                                                       | TERM    | 0.188 ± 0.413 | 0.001 | 0.240 ± 1.056 | 0.000 | 0.086 ± 0.330  | 0.004 | 0.074 ± 0.263 | 0.001 |
|                                                              | PRETERM | 0.839 ± 1.260 |       | 0.632 ± 1.027 |       | 0.483 ± 0.813  |       | 0.376 ± 0.618 |       |

**Table S3.** Relative proportion (%) of the *Bifidobacterium* species in the faeces of vaginally delivered and Cs-delivered full-term neonates at 2, 10, 30 and 90 days of age. ns: non statistically significant differences (p>0.05).

|                                                  |           | 2 d           |         | 10 d          |         | 30 d          |         | 90 d          |         |
|--------------------------------------------------|-----------|---------------|---------|---------------|---------|---------------|---------|---------------|---------|
|                                                  |           | Mean ± SD     | p-value | Mean ± SD     | p-value | Mean ± SD     | p-value | Mean ± SD     | p-value |
| <b><i>B. animalis</i> subsp. <i>animalis</i></b> | VAGINAL   | 0.267 ± 0.693 | ns      | 0.036 ± 0.126 | ns      | 0.367 ± 1.781 | ns      | 0.319 ± 1.342 | ns      |
|                                                  | C-SECTION | 0.259 ± 0.772 |         | 0.001 ± 0.002 |         | 0.008 ± 0.017 |         | 0.003 ± 0.004 |         |
| <b><i>B. anseris</i></b>                         | VAGINAL   | 0.013 ± 0.075 | ns      | 0.007 ± 0.029 | ns      | 0.000 ± 0.000 | ns      | 0.001 ± 0.002 | ns      |
|                                                  | C-SECTION | 0.000 ± 0.000 |         | 0.000 ± 0.000 |         | 0.069 ± 0.189 |         | 0.005 ± 0.014 |         |
| <b><i>B. biavatii</i></b>                        | VAGINAL   | 0.001 ± 0.004 | ns      | 0.003 ± 0.012 | ns      | 0.003 ± 0.013 | ns      | 0.002 ± 0.010 | ns      |
|                                                  | C-SECTION | 0.000 ± 0.000 |         | 0.000 ± 0.000 |         | 0.000 ± 0.000 |         | 0.000 ± 0.000 |         |
| <b><i>B. choerinum</i></b>                       | VAGINAL   | 0.005 ± 0.027 | ns      | 0.004 ± 0.023 | ns      | 0.001 ± 0.004 | ns      | 0.001 ± 0.003 | ns      |
|                                                  | C-SECTION | 0.001 ± 0.002 |         | 0.001 ± 0.001 |         | 0.001 ± 0.001 |         | 0.000 ± 0.000 |         |
| <b><i>B. crudilactis</i></b>                     | VAGINAL   | 0.185 ± 1.028 | ns      | 0.010 ± 0.039 | ns      | 0.000 ± 0.001 | ns      | 0.005 ± 0.018 | ns      |
|                                                  | C-SECTION | 0.002 ± 0.006 |         | 0.063 ± 0.189 |         | 0.001 ± 0.003 |         | 0.004 ± 0.009 |         |
| <b><i>B. eulemuris</i></b>                       | VAGINAL   | 0.051 ± 0.208 | ns      | 0.017 ± 0.088 | ns      | 0.000 ± 0.001 | ns      | 0.000 ± 0.001 | ns      |
|                                                  | C-SECTION | 0.074 ± 0.222 |         | 0.001 ± 0.002 |         | 0.149 ± 0.411 |         | 0.000 ± 0.001 |         |
| <b><i>B. italicum</i></b>                        | VAGINAL   | 0.002 ± 0.013 | ns      | 0.003 ± 0.010 | ns      | 0.000 ± 0.001 | ns      | 0.000 ± 0.001 | ns      |
|                                                  | C-SECTION | 0.000 ± 0.000 |         | 0.000 ± 0.000 |         | 0.000 ± 0.000 |         | 0.000 ± 0.000 |         |
| <b><i>B. kashiwanohense</i></b>                  | VAGINAL   | 0.635 ± 2.289 | ns      | 0.054 ± 0.186 | ns      | 0.946 ± 4.924 | ns      | 0.642 ± 3.045 | ns      |
|                                                  | C-SECTION | 0.003 ± 0.006 |         | 0.079 ± 0.236 |         | 0.060 ± 0.160 |         | 0.008 ± 0.014 |         |
| <b><i>B. longum</i> subsp. <i>suis</i></b>       | VAGINAL   | 0.369 ± 1.624 | ns      | 0.473 ± 2.427 | ns      | 0.678 ± 3.340 | ns      | 0.129 ± 0.344 | ns      |
|                                                  | C-SECTION | 0.022 ± 0.034 |         | 0.504 ± 0.964 |         | 0.191 ± 0.448 |         | 0.010 ± 0.025 |         |
| <b><i>B. longum</i> subspp</b>                   | VAGINAL   | 0.019 ± 0.028 | ns      | 0.039 ± 0.168 | ns      | 0.056 ± 0.228 | ns      | 0.019 ± 0.038 | ns      |
|                                                  | C-SECTION | 0.039 ± 0.041 |         | 0.027 ± 0.048 |         | 0.016 ± 0.025 |         | 0.013 ± 0.014 |         |
| <b><i>B. magnum</i></b>                          | VAGINAL   | 0.002 ± 0.005 | ns      | 0.005 ± 0.026 | ns      | 0.001 ± 0.002 | ns      | 0.008 ± 0.034 | ns      |
|                                                  | C-SECTION | 0.004 ± 0.009 |         | 0.189 ± 0.566 |         | 0.004 ± 0.010 |         | 0.010 ± 0.025 |         |
| <b><i>B. mongoliense</i></b>                     | VAGINAL   | 0.019 ± 0.077 | ns      | 0.005 ± 0.021 | ns      | 0.068 ± 0.330 | ns      | 0.014 ± 0.070 | ns      |
|                                                  | C-SECTION | 0.000 ± 0.000 |         | 0.000 ± 0.000 |         | 0.003 ± 0.008 |         | 0.005 ± 0.011 |         |
| <b><i>B. parmae</i></b>                          | VAGINAL   | 1.219 ± 5.091 | ns      | 0.073 ± 0.218 | ns      | 0.020 ± 0.072 | ns      | 0.002 ± 0.007 | ns      |
|                                                  | C-SECTION | 1.115 ± 2.224 |         | 0.000 ± 0.000 |         | 0.014 ± 0.040 |         | 0.000 ± 0.001 |         |
| <b><i>B. pseudolongum</i> subspp</b>             | VAGINAL   | 0.771 ± 2.938 | ns      | 0.139 ± 0.737 | ns      | 0.001 ± 0.003 | ns      | 0.025 ± 0.125 | ns      |
|                                                  | C-SECTION | 0.018 ± 0.053 |         | 0.045 ± 0.096 |         | 0.006 ± 0.013 |         | 0.031 ± 0.080 |         |
| <b><i>B. reuteri</i></b>                         | VAGINAL   | 0.043 ± 0.159 | ns      | 0.028 ± 0.108 | ns      | 0.019 ± 0.090 | ns      | 0.020 ± 0.078 | ns      |



|                                                                 |           |               |    |               |    |                |    |                |    |
|-----------------------------------------------------------------|-----------|---------------|----|---------------|----|----------------|----|----------------|----|
|                                                                 | C-SECTION | 0.003 ± 0.007 |    | 0.124 ± 0.350 |    | 0.008 ± 0.022  |    | 0.008 ± 0.020  |    |
| <i>B. scardovii</i>                                             | VAGINAL   | 0.032 ± 0.171 | ns | 0.010 ± 0.049 | ns | 0.005 ± 0.019  | ns | 0.004 ± 0.010  | ns |
|                                                                 | C-SECTION | 0.075 ± 0.220 |    | 0.031 ± 0.094 |    | 3.259 ± 9.768  |    | 1.879 ± 4.972  |    |
| <i>B. stellenboschense</i>                                      | VAGINAL   | 0.040 ± 0.137 | ns | 0.000 ± 0.000 | ns | 0.000 ± 0.001  | ns | 0.000 ± 0.001  | ns |
|                                                                 | C-SECTION | 0.000 ± 0.000 |    | 0.036 ± 0.100 |    | 0.000 ± 0.000  |    | 0.000 ± 0.000  |    |
| <i>B. thermacidophilum</i><br>subsp. <i>porcinum</i>            | VAGINAL   | 0.004 ± 0.023 | ns | 0.002 ± 0.006 | ns | 0.000 ± 0.000  | ns | 0.001 ± 0.005  | ns |
|                                                                 | C-SECTION | 0.000 ± 0.000 |    | 0.000 ± 0.000 |    | 0.082 ± 0.246  |    | 0.000 ± 0.000  |    |
| <i>B. thermacidophilum</i><br>subsp.<br><i>thermacidophilum</i> | VAGINAL   | 0.001 ± 0.002 |    | 0.013 ± 0.064 |    | 0.000 ± 0.001  |    | 0.002 ± 0.005  |    |
|                                                                 | C-SECTION | 0.000 ± 0.000 | ns | 0.000 ± 0.000 | ns | 0.000 ± 0.001  | ns | 0.000 ± 0.000  | ns |
| <i>B. thermophilum</i>                                          | VAGINAL   | 0.035 ± 0.141 | ns | 0.006 ± 0.019 | ns | 0.003 ± 0.010  | ns | 0.008 ± 0.027  | ns |
|                                                                 | C-SECTION | 0.001 ± 0.003 |    | 0.034 ± 0.065 |    | 0.002 ± 0.004  |    | 0.002 ± 0.003  |    |
| <i>B. tissieri</i>                                              | VAGINAL   | 0.182 ± 1.048 | ns | 0.000 ± 0.000 | ns | 0.000 ± 0.000  | ns | 0.000 ± 0.000  | ns |
|                                                                 | C-SECTION | 0.000 ± 0.000 |    | 0.000 ± 0.000 |    | 0.000 ± 0.000  |    | 0.000 ± 0.000  |    |
| <i>B. tsurumiense</i>                                           | VAGINAL   | 0.000 ± 0.001 | ns | 0.001 ± 0.003 | ns | 0.000 ± 0.000  | ns | 0.001 ± 0.003  | ns |
|                                                                 | C-SECTION | 0.001 ± 0.003 |    | 0.000 ± 0.000 |    | 0.000 ± 0.000  |    | 0.000 ± 0.000  |    |
| <i>B. vansinderenii</i>                                         | VAGINAL   | 0.024 ± 0.137 | ns | 0.020 ± 0.110 | ns | 0.000 ± 0.001  | ns | 0.000 ± 0.002  | ns |
|                                                                 | C-SECTION | 0.014 ± 0.040 |    | 0.018 ± 0.050 |    | 0.000 ± 0.000  |    | 0.007 ± 0.018  |    |
| Putative new<br>bifidobacterial species                         | VAGINAL   | 2.415 ± 8.244 | ns | 1.515 ± 4.363 | ns | 5.544 ± 15.456 | ns | 4.230 ± 10.281 | ns |
|                                                                 | C-SECTION | 0.710 ± 1.326 |    | 0.909 ± 1.800 |    | 0.430 ± 0.905  |    | 0.250 ± 0.357  |    |
| Others                                                          | VAGINAL   | 0.174 ± 0.371 | ns | 0.104 ± 0.335 | ns | 0.108 ± 0.373  | ns | 0.088 ± 0.293  | ns |
|                                                                 | C-SECTION | 0.240 ± 0.568 |    | 0.740 ± 2.215 |    | 0.012 ± 0.025  |    | 0.015 ± 0.029  |    |

**Table S4.** Relative proportion (%) of the *Bifidobacterium* species in the faeces of vaginally delivered and CS-delivered preterm neonates at 2, 10, 30 and 90 days of age. ns: non statistically significant differences (p>0.05).

|                                                   |           | 2 d             |         | 10 d            |         | 30 d            |         | 90 d            |         |
|---------------------------------------------------|-----------|-----------------|---------|-----------------|---------|-----------------|---------|-----------------|---------|
|                                                   |           | Mean ± SD       | p-value | Mean ± SD       | p-value | Mean ± SD       | p-value | Mean ± SD       | p-value |
| <i>B. longum</i> subsp. <i>longum</i>             | VAGINAL   | 25.330 ± 27.040 | ns      | 24.160 ± 28.644 | ns      | 15.880 ± 22.914 | ns      | 11.200 ± 14.490 | ns      |
|                                                   | C-SECTION | 26.820 ± 29.080 |         | 23.600 ± 28.724 |         | 11.900 ± 15.452 |         | 9.730 ± 13.380  |         |
| <i>B. breve</i>                                   | VAGINAL   | 19.930 ± 9.808  | ns      | 11.590 ± 10.033 | ns      | 36.490 ± 31.858 | ns      | 41.500 ± 28.200 | ns      |
|                                                   | C-SECTION | 18.390 ± 21.720 |         | 21.420 ± 26.048 |         | 37.130 ± 37.192 |         | 53.600 ± 31.850 |         |
| <i>B. pseudolongum</i> subsp. <i>globosum</i>     | VAGINAL   | 10.190 ± 9.562  | ns      | 16.490 ± 16.720 | ns      | 13.500 ± 15.340 | 0.036   | 6.230 ± 9.879   | ns      |
|                                                   | C-SECTION | 10.960 ± 12.150 |         | 10.480 ± 13.250 |         | 5.143 ± 7.870   |         | 2.120 ± 3.434   |         |
| <i>B. animalis</i> subsp. <i>lactis</i>           | VAGINAL   | 8.367 ± 5.717   | ns      | 6.273 ± 6.165   | ns      | 2.918 ± 3.544   | ns      | 3.790 ± 5.644   | ns      |
|                                                   | C-SECTION | 10.500 ± 9.995  |         | 9.493 ± 16.703  |         | 3.691 ± 4.722   |         | 3.920 ± 8.229   |         |
| <i>B. asteroides</i>                              | VAGINAL   | 5.363 ± 6.792   | 0.019   | 5.448 ± 11.418  | ns      | 2.784 ± 3.856   | 0.029   | 2.760 ± 4.442   | ns      |
|                                                   | C-SECTION | 1.761 ± 3.343   |         | 3.574 ± 7.113   |         | 1.735 ± 5.373   |         | 1.830 ± 3.954   |         |
| <i>B. bifidum</i>                                 | VAGINAL   | 4.535 ± 4.882   | 0.005   | 2.791 ± 4.613   | ns      | 2.425 ± 4.166   | ns      | 1.160 ± 1.045   | ns      |
|                                                   | C-SECTION | 1.614 ± 2.905   |         | 2.730 ± 3.900   |         | 3.935 ± 7.293   |         | 2.780 ± 5.434   |         |
| <i>B. adolescentis</i>                            | VAGINAL   | 4.418 ± 3.897   | ns      | 4.663 ± 5.907   | ns      | 2.309 ± 4.030   | ns      | 0.449 ± 0.500   | ns      |
|                                                   | C-SECTION | 10.650 ± 17.440 |         | 8.523 ± 13.085  |         | 7.069 ± 13.314  |         | 5.450 ± 14.600  |         |
| <i>B. pseudolongum</i> subsp. <i>pseudolongum</i> | VAGINAL   | 4.122 ± 4.523   | ns      | 5.327 ± 5.404   | ns      | 3.885 ± 6.055   | ns      | 0.972 ± 1.171   | ns      |
|                                                   | C-SECTION | 5.083 ± 7.500   |         | 3.158 ± 4.272   |         | 1.841 ± 4.315   |         | 0.756 ± 1.266   |         |
| <i>B. dentium</i>                                 | VAGINAL   | 3.902 ± 11.140  | ns      | 6.130 ± 21.689  | ns      | 5.296 ± 11.309  | ns      | 15.200 ± 31.590 | ns      |
|                                                   | C-SECTION | 4.047 ± 10.890  |         | 2.402 ± 6.040   |         | 10.510 ± 26.145 |         | 4.600 ± 17.050  |         |
| <i>B. pseudocatenulatum</i>                       | VAGINAL   | 3.102 ± 9.282   | ns      | 3.503 ± 12.752  | ns      | 7.007 ± 23.518  | ns      | 10.200 ± 20.290 | ns      |
|                                                   | C-SECTION | 2.059 ± 5.273   |         | 0.384 ± 0.574   |         | 0.603 ± 1.077   |         | 5.180 ± 13.180  |         |
| <i>B. longum</i> subsp. <i>suis</i>               | VAGINAL   | 1.404 ± 1.085   | ns      | 1.677 ± 3.580   | ns      | 0.421 ± 0.469   | ns      | 0.705 ± 1.492   | ns      |
|                                                   | C-SECTION | 1.868 ± 2.459   |         | 2.417 ± 3.258   |         | 2.314 ± 7.211   |         | 2.200 ± 7.463   |         |
| <i>B. pseudolongum</i> subsp.                     | VAGINAL   | 0.904 ± 1.728   | ns      | 1.428 ± 2.250   | ns      | 0.981 ± 1.729   | ns      | 0.756 ± 1.902   | ns      |
|                                                   | C-SECTION | 0.543 ± 0.922   |         | 1.266 ± 2.450   |         | 0.455 ± 1.286   |         | 0.280 ± 0.751   |         |
| <i>B. longum</i> subsp. <i>infantis</i>           | VAGINAL   | 0.668 ± 1.288   | ns      | 0.508 ± 1.151   | ns      | 0.222 ± 0.693   | ns      | 0.059 ± 0.139   | ns      |
|                                                   | C-SECTION | 0.576 ± 1.102   |         | 0.340 ± 0.617   |         | 7.653 ± 23.550  |         | 5.820 ± 16.170  |         |
| <i>B. magnum</i>                                  | VAGINAL   | 0.654 ± 0.600   | 0.005   | 0.266 ± 0.372   | ns      | 0.297 ± 0.545   | ns      | 0.073 ± 0.070   | ns      |
|                                                   | C-SECTION | 0.212 ± 0.397   |         | 0.333 ± 0.541   |         | 0.267 ± 0.575   |         | 0.144 ± 0.391   |         |
| <i>B. catenulatum</i>                             | VAGINAL   | 0.428 ± 0.452   | ns      | 1.092 ± 2.349   | ns      | 0.120 ± 0.148   | ns      | 0.118 ± 0.307   | ns      |

|                                                              |           |               |       |               |       |               |       |               |       |
|--------------------------------------------------------------|-----------|---------------|-------|---------------|-------|---------------|-------|---------------|-------|
|                                                              | C-SECTION | 0.299 ± 0.444 | —     | 0.404 ± 0.755 |       | 0.106 ± 0.213 |       | 0.101 ± 0.230 |       |
| <i>B. thermacidophilum</i><br>subsp. <i>thermacidophilum</i> | VAGINAL   | 0.408 ± 0.764 |       | 0.112 ± 0.246 |       | 0.149 ± 0.526 |       | 0.018 ± 0.023 |       |
|                                                              | C-SECTION | 0.090 ± 0.251 | ns    | 0.114 ± 0.200 | ns    | 0.093 ± 0.174 | ns    | 0.050 ± 0.188 | ns    |
| <i>B. reuteri</i>                                            | VAGINAL   | 0.284 ± 0.433 |       | 0.103 ± 0.226 |       | 0.094 ± 0.186 |       | 0.045 ± 0.050 |       |
|                                                              | C-SECTION | 0.085 ± 0.204 | ns    | 0.046 ± 0.127 | 0.050 | 0.006 ± 0.021 | 0.024 | 0.030 ± 0.055 | ns    |
| <i>B. crudilactis</i>                                        | VAGINAL   | 0.228 ± 0.273 |       | 0.191 ± 0.234 |       | 0.182 ± 0.216 |       | 0.105 ± 0.198 |       |
|                                                              | C-SECTION | 0.125 ± 0.187 | ns    | 0.368 ± 0.875 | ns    | 0.069 ± 0.127 | 0.031 | 0.050 ± 0.108 | ns    |
| <i>B. mongoliense</i>                                        | VAGINAL   | 0.215 ± 0.283 |       | 0.191 ± 0.382 |       | 0.068 ± 0.098 |       | 0.042 ± 0.055 |       |
|                                                              | C-SECTION | 0.043 ± 0.074 | 0.006 | 0.067 ± 0.091 | ns    | 0.070 ± 0.123 | ns    | 0.042 ± 0.100 | ns    |
| <i>B. thermophilum</i>                                       | VAGINAL   | 0.127 ± 0.159 |       | 0.048 ± 0.070 |       | 0.077 ± 0.171 |       | 0.081 ± 0.195 |       |
|                                                              | C-SECTION | 0.051 ± 0.130 | ns    | 0.086 ± 0.127 | ns    | 0.064 ± 0.169 | ns    | 0.017 ± 0.057 | ns    |
| <i>B. anseris</i>                                            | VAGINAL   | 0.122 ± 0.136 |       | 0.516 ± 0.928 |       | 0.067 ± 0.073 |       | 0.066 ± 0.067 |       |
|                                                              | C-SECTION | 0.519 ± 1.494 | ns    | 0.262 ± 0.521 | ns    | 0.566 ± 1.728 | ns    | 0.006 ± 0.010 | 0.012 |
| <i>B. vansinderenii</i>                                      | VAGINAL   | 0.114 ± 0.151 |       | 0.139 ± 0.173 |       | 0.083 ± 0.971 |       | 0.243 ± 0.589 |       |
|                                                              | C-SECTION | 0.081 ± 0.147 | ns    | 0.089 ± 0.184 | ns    | 0.079 ± 0.162 | ns    | 0.019 ± 0.035 | ns    |
| <i>B. scardovii</i>                                          | VAGINAL   | 0.095 ± 0.234 |       | 0.046 ± 0.147 |       | 0.025 ± 0.085 |       | 0.444 ± 1.382 |       |
|                                                              | C-SECTION | 0.002 ± 0.005 | ns    | 0.008 ± 0.020 | ns    | 0.022 ± 0.080 | ns    | 0.008 ± 0.026 | ns    |
| <i>B. kashiwanohense</i>                                     | VAGINAL   | 0.089 ± 0.131 |       | 0.030 ± 0.054 |       | 0.033 ± 0.061 |       | 0.044 ± 0.104 |       |
|                                                              | C-SECTION | 0.018 ± 0.045 | ns    | 0.040 ± 0.103 | ns    | 0.008 ± 0.017 | ns    | 0.034 ± 0.113 | ns    |
| <i>B. eulemuris</i>                                          | VAGINAL   | 0.064 ± 0.201 |       | 0.386 ± 1.558 |       | 1.736 ± 6.944 |       | 0.002 ± 0.007 |       |
|                                                              | C-SECTION | 0.412 ± 1.270 | ns    | 0.101 ± 0.358 | ns    | 0.000 ± 0.000 | ns    | 0.000 ± 0.001 | ns    |
| <i>B. parmae</i>                                             | VAGINAL   | 0.059 ± 0.103 |       | 0.096 ± 0.290 |       | 0.053 ± 0.194 |       | 0.010 ± 0.022 |       |
|                                                              | C-SECTION | 0.711 ± 3.066 | ns    | 1.105 ± 5.024 | ns    | 0.806 ± 2.501 | ns    | 0.227 ± 0.442 | ns    |
| <i>B. italicum</i>                                           | VAGINAL   | 0.044 ± 0.108 |       | 0.057 ± 0.080 |       | 0.015 ± 0.024 |       | 0.933 ± 2.842 |       |
|                                                              | C-SECTION | 0.060 ± 0.084 | ns    | 1.517 ± 7.227 | ns    | 0.034 ± 0.065 | ns    | 0.011 ± 0.029 | ns    |
| <i>B. choerinum</i>                                          | VAGINAL   | 0.042 ± 0.128 |       | 0.098 ± 0.183 |       | 0.029 ± 0.068 |       | 0.010 ± 0.022 |       |
|                                                              | C-SECTION | 0.122 ± 0.282 | ns    | 0.103 ± 0.220 | ns    | 0.088 ± 0.248 | ns    | 0.013 ± 0.033 | ns    |
| <i>B. animalis</i> subsp. <i>animalis</i>                    | VAGINAL   | 0.041 ± 0.066 |       | 0.090 ± 0.230 |       | 0.010 ± 0.020 |       | 0.007 ± 0.011 |       |
|                                                              | C-SECTION | 0.074 ± 0.247 | ns    | 0.154 ± 0.446 | ns    | 0.084 ± 0.332 | ns    | 0.005 ± 0.015 | ns    |
| <i>B. biavatii</i>                                           | VAGINAL   | 0.041 ± 0.093 |       | 0.058 ± 0.184 |       | 0.036 ± 0.136 |       | 0.006 ± 0.014 |       |
|                                                              | C-SECTION | 0.013 ± 0.036 | ns    | 0.050 ± 0.128 | ns    | 0.115 ± 0.333 | ns    | 0.001 ± 0.004 | ns    |
| <i>B. longum</i> subspp                                      | VAGINAL   | 0.035 ± 0.033 | ns    | 0.037 ± 0.041 | ns    | 0.021 ± 0.031 | ns    | 0.024 ± 0.027 | ns    |

|                                                      |           |               |       |                |    |               |    |               |    |
|------------------------------------------------------|-----------|---------------|-------|----------------|----|---------------|----|---------------|----|
|                                                      | C-SECTION | 0.050 ± 0.076 |       | 0.038 ± 0.045  |    | 0.109 ± 0.366 |    | 0.161 ± 0.495 |    |
| <i>B. stellenboschense</i>                           | VAGINAL   | 0.018 ± 0.056 | ns    | 1.390 ± 5.696  | ns | 0.011 ± 0.033 | ns | 0.003 ± 0.005 | ns |
|                                                      | C-SECTION | 0.007 ± 0.026 |       | 0.009 ± 0.029  |    | 0.005 ± 0.012 |    | 0.001 ± 0.003 |    |
| <i>B. thermacidophilum</i><br><b>subsp. porcinum</b> | VAGINAL   | 0.029 ± 0.055 | ns    | 0.218 ± 0.445  | ns | 0.032 ± 0.049 | ns | 0.012 ± 0.016 | ns |
|                                                      | C-SECTION | 0.177 ± 0.548 |       | 2.738 ± 12.896 |    | 0.184 ± 0.577 |    | 0.023 ± 0.057 |    |
| <i>B. tsurumiense</i>                                | VAGINAL   | 0.027 ± 0.040 | 0.034 | 0.004 ± 0.010  | ns | 0.014 ± 0.035 | ns | 0.005 ± 0.007 | ns |
|                                                      | C-SECTION | 0.003 ± 0.007 |       | 0.008 ± 0.027  |    | 1.516 ± 7.094 |    | 0.001 ± 0.005 |    |
| <i>B. tissieri</i>                                   | VAGINAL   | 0.009 ± 0.036 | ns    | 0.010 ± 0.025  | ns | 0.002 ± 0.005 | ns | 0.001 ± 0.004 | ns |
|                                                      | C-SECTION | 0.011 ± 0.025 |       | 0.012 ± 0.027  |    | 0.021 ± 0.043 |    | 0.061 ± 0.238 |    |
| <b>Putative new bifido-<br/>bacterial species</b>    | VAGINAL   | 3.646 ± 2.115 | 0.001 | 4.104 ± 4.871  | ns | 2.088 ± 2.639 | ns | 2.120 ± 4.125 | ns |
|                                                      | C-SECTION | 1.335 ± 1.772 |       | 2.005 ± 2.302  |    | 1.346 ± 1.751 |    | 0.523 ± 0.949 |    |
| <b>Others</b>                                        | VAGINAL   | 1.121 ± 1.146 | ns    | 0.732 ± 0.991  | ns | 0.649 ± 0.988 | ns | 0.564 ± 0.659 | ns |
|                                                      | C-SECTION | 0.631 ± 1.325 |       | 0.561 ± 1.068  |    | 0.363 ± 0.657 |    | 0.259 ± 0.581 |    |
